# Supplementary material for: Deciphering the doublet luminescence mechanism in neutral organic radicals: spin-exchange coupling, reversed-quartet mechanism, excited-state dynamics
Source: Royal Society of Chemistry journal article supplement (doi:10.1039/d4ra03566f), 2024-01-01
Supplement: d4ra03566f1.pdf [file d4ra03566f1.pdf]

## Electronic Supporting Information (ESI)

### **Deciphering the doublet luminescence mechanism in neutral organic radical: Spin-exchange coupling, reversed-quartet mechanism, excited-state dynamics**

LingLing Lv,<sup>\* a, b</sup> YanYing Zhang,<sup>a</sup> ZiYe Ning<sup>a</sup>

<sup>a</sup>*School of Chemical Engineering and Technology, Tianshui Normal University, Tianshui, Gansu 741001, China.*

<sup>b</sup>*Key Laboratory of Advanced Optoelectronic Functional Materials of Gansu Province, Tianshui Normal University, Tianshui, Gansu 741001, China.*

---

\* Corresponding author: e-mail: lvling002@tsnu.edu.cn/lvling002@163.com

**Table S1** Vital transition active orbital at the  $\omega$ B97X-D3 and CASSCF levels for the excited states of the TTM-1Cz-An compound.

|             |                                                                                   |                                                                                   |                                                                                   |                                                                                     |                                                                                     |
|-------------|-----------------------------------------------------------------------------------|-----------------------------------------------------------------------------------|-----------------------------------------------------------------------------------|-------------------------------------------------------------------------------------|-------------------------------------------------------------------------------------|
| Method      | HOMO-4                                                                            | HOMO-1                                                                            | HOMO                                                                              | SOMO                                                                                | LUMO                                                                                |
| wB97X-D3    | 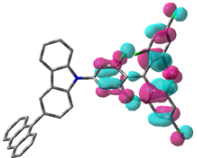 |  |  |  |  |
| Method      | HOMO-2                                                                            | HOMO-1                                                                            | HOMO                                                                              | SOMO                                                                                | LUMO                                                                                |
| CASSCF(7,5) |  |  |  |  |  |

**Table S2** Natural transition orbital (NTO) pairs at the  $\omega$ B97X-D3 level with Tamm-Dancoff approximation for the excited states of TTM-1Cz-An.

| Excited state  | Excited energy (eV) | Nature transition orbital                                                                                          | Orbital composition |
|----------------|---------------------|--------------------------------------------------------------------------------------------------------------------|---------------------|
| D <sub>1</sub> | 2.251               | 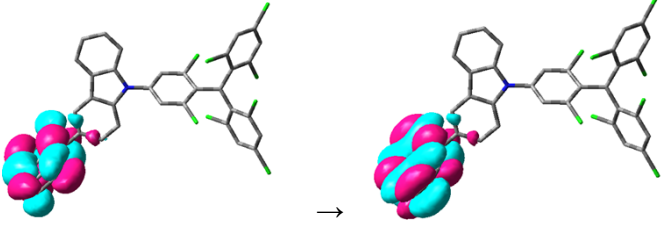<br>217 $\alpha$ → 218 $\alpha$ | 45.7%               |
|                |                     | <br>216 $\beta$ → 217 $\beta$  | 45.7%               |
| D <sub>2</sub> | 3.122               | <br>216 $\beta$ → 217 $\beta$  | 78.2%               |

|                |       |                                                                                                    |       |
|----------------|-------|----------------------------------------------------------------------------------------------------|-------|
| D <sub>3</sub> | 3.202 | 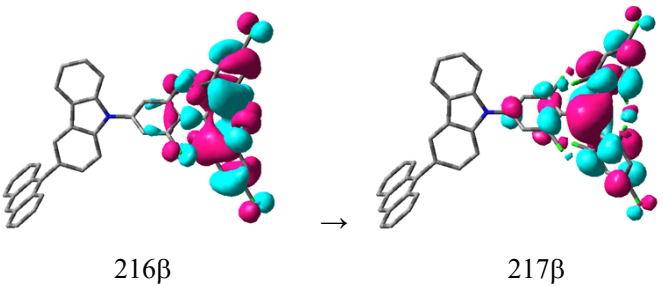<br>216β → 217β  | 71.5% |
| D <sub>4</sub> | 3.548 | <br>216β → 217β  | 50.9% |
|                |       | <br>217α → 218α | 11.5% |

**Table S3** Natural transition orbital (NTO) pairs at the CAM-B3LYP level with Tamm-Dancoff approximation for the excited states of TTM-1Cz-An.

| Excited state  | Excited energy (eV) | Nature transition orbital                                                                           | Orbital composition |
|----------------|---------------------|-----------------------------------------------------------------------------------------------------|---------------------|
| D <sub>1</sub> | 2.169               | 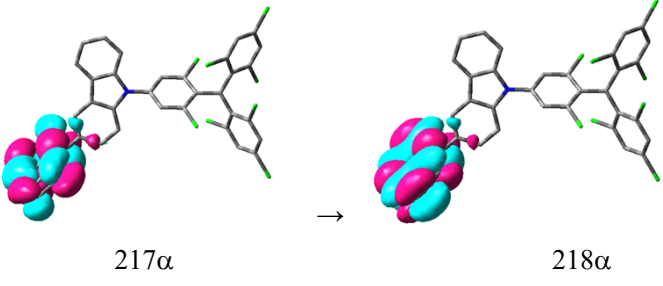<br>217α → 218α | 46.2%               |
|                |                     | <br>216β → 217β | 46.2%               |

|                |       |                                                                                                                                                                                                 |       |
|----------------|-------|-------------------------------------------------------------------------------------------------------------------------------------------------------------------------------------------------|-------|
| D <sub>2</sub> | 2.904 | 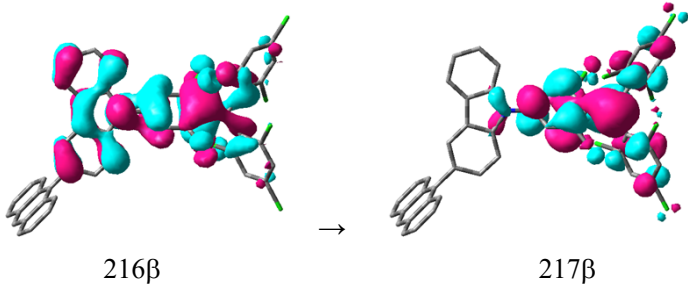 <p>216<math>\beta</math> → 217<math>\beta</math></p>                                                         | 88.1% |
| D <sub>3</sub> | 3.122 |  <p>216<math>\beta</math> → 217<math>\beta</math></p>                                                         | 74.1% |
| D <sub>4</sub> | 3.400 |  <p>216<math>\beta</math> → 217<math>\beta</math></p> <p>217<math>\alpha</math> → 218<math>\alpha</math></p> | 60.9% |
|                |       |                                                                                                                                                                                                 | 14.1% |

**Table S4** Spin density and density difference for the key excited states of TTM-1Cz-An.

| Excited state  | wB97X-D3/def2-TZVP//def2/j                                                          |                                                                                     | CAM-B3LYP/def2-TZVP//def2/J                                                          |                                                                                       |
|----------------|-------------------------------------------------------------------------------------|-------------------------------------------------------------------------------------|--------------------------------------------------------------------------------------|---------------------------------------------------------------------------------------|
|                | Spin density                                                                        | Density difference                                                                  | Spin density                                                                         | Density difference                                                                    |
| D <sub>1</sub> | 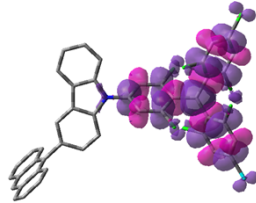   |    |    |    |
| D <sub>2</sub> |    |    |    |    |
| D <sub>3</sub> |    |    |    |    |
| D <sub>4</sub> |  |  |  |  |
| Q <sub>1</sub> |  |                                                                                     |  |                                                                                       |

**Table S5** Contributions to the ZFS tensors ( $D$  and  $E$ ) from spin-orbit coupling and spin–spin dipolar (all values are in  $\text{cm}^{-1}$ ) with the SOMF operator for the quartet  $Q_1$  state.

| Method                      | $\omega\text{B97X-D3}$ |          | CAM-B3LYP |          |
|-----------------------------|------------------------|----------|-----------|----------|
|                             | $D$                    | $E$      | $D$       | $E$      |
| Spin-Spin                   | 0.00373                | -0.00211 | 0.00399   | 0.00025  |
| SOC                         | -0.02927               | -0.00295 | -0.03002  | -0.00536 |
| $\alpha \rightarrow \alpha$ | -0.31804               | 0.00908  | -0.32683  | -0.01103 |
| $\beta \rightarrow \beta$   | -0.31460               | 0.01260  | -0.32384  | -0.01367 |
| $\alpha \rightarrow \beta$  | 0.45509                | -0.02126 | 0.46807   | 0.01171  |
| $\beta \rightarrow \alpha$  | 0.14828                | -0.00337 | 0.15258   | 0.00764  |
| Total                       | -0.02556               | -0.00507 | -0.02604  | -0.00508 |

**Table S6** The projections of the eigenfunctions on the model space at the vibration and non-vibration levels; here,  $C^2 |S, M_S\rangle$ :  $C^2$  denotes the configuration weight coefficients,  $S$  is spin quantum number, and  $M_S$  denotes spin-sublevels.

| Non-vibration coupling                                                                              | Vibration coupling                                                                                  |
|-----------------------------------------------------------------------------------------------------|-----------------------------------------------------------------------------------------------------|
| $ \Phi_6\rangle = 0.99  1/2, +1/2\rangle$                                                           | $ \Phi_6\rangle = 0.88  1/2, +1/2\rangle + 0.12  3/2, \pm 1/2 \text{ or } +3/2\rangle$              |
| $ \Phi_5\rangle = 0.99  1/2, -1/2\rangle$                                                           | $ \Phi_5\rangle = 0.88  1/2, -1/2\rangle + 0.12  3/2, \pm 1/2 \text{ or } -3/2\rangle$              |
| $ \Phi_4\rangle = 0.61  3/2, +1/2\rangle + 0.19  3/2, -1/2\rangle$<br>+ 0.20 $ 3/2, \pm 3/2\rangle$ | $ \Phi_4\rangle = 0.49  3/2, +1/2\rangle + 0.12  3/2, -1/2\rangle$<br>+ 0.39 $ 3/2, \pm 3/2\rangle$ |
| $ \Phi_3\rangle = 0.61  3/2, -1/2\rangle + 0.19  3/2, +1/2\rangle$<br>+ 0.20 $ 3/2, \pm 3/2\rangle$ | $ \Phi_3\rangle = 0.49  3/2, -1/2\rangle + 0.12  3/2, +1/2\rangle$<br>+ 0.39 $ 3/2, \pm 3/2\rangle$ |
| $ \Phi_2\rangle = 0.73  3/2, -3/2\rangle + 0.06  3/2, +3/2\rangle$<br>+ 0.21 $ 3/2, \pm 1/2\rangle$ | $ \Phi_2\rangle = 0.51  3/2, +3/2\rangle + 0.35  3/2, \pm 1/2\rangle$<br>+ 0.11 $ 1/2, +1/2\rangle$ |
| $ \Phi_1\rangle = 0.73  3/2, +3/2\rangle + 0.06  3/2, -3/2\rangle$<br>+ 0.21 $ 3/2, \pm 1/2\rangle$ | $ \Phi_1\rangle = 0.51  3/2, -3/2\rangle + 0.35  3/2, \pm 1/2\rangle$<br>+ 0.11 $ 1/2, -1/2\rangle$ |

**Table S7** Spin-orbit coupling (SOC) matrix elements ( $\text{cm}^{-1}$ ) between excited states of TTM-1Cz-An calculated at the CASSCF level.  $S$  is spin quantum number;  $M_S$  denotes spin-sublevels.

| State 1                                                                                     | State 2        | $\langle S_1 = 3/2, M_{S_{1,k}}   \hat{H}_{\text{SOC}}   S_2 = 1/2, M_{S_{2,k}} \rangle$     |
|---------------------------------------------------------------------------------------------|----------------|----------------------------------------------------------------------------------------------|
| Q <sub>1</sub>                                                                              | D <sub>0</sub> | $\langle S_1 = 3/2, 3/2   \hat{H}_{\text{SOC}}   S_2 = 1/2, 1/2 \rangle = 0.013 + 0.006i$    |
|                                                                                             |                | $\langle S_1 = 3/2, 1/2   \hat{H}_{\text{SOC}}   S_2 = 1/2, 1/2 \rangle = -0.000 + 0.005i$   |
|                                                                                             |                | $\langle S_1 = 3/2, -1/2   \hat{H}_{\text{SOC}}   S_2 = 1/2, 1/2 \rangle = 0.008 - 0.003i$   |
|                                                                                             |                | $\langle S_1 = 3/2, -3/2   \hat{H}_{\text{SOC}}   S_2 = 1/2, -1/2 \rangle = 0.013 - 0.006i$  |
|                                                                                             |                | $\langle S_1 = 3/2, -1/2   \hat{H}_{\text{SOC}}   S_2 = 1/2, -1/2 \rangle = -0.000 + 0.005i$ |
|                                                                                             |                | $\langle S_1 = 3/2, 1/2   \hat{H}_{\text{SOC}}   S_2 = 1/2, -1/2 \rangle = 0.008 + 0.003i$   |
|                                                                                             | D <sub>1</sub> | $\langle S_1 = 3/2, 3/2   \hat{H}_{\text{SOC}}   S_2 = 1/2, 1/2 \rangle = -0.001 + 0.001i$   |
|                                                                                             |                | $\langle S_1 = 3/2, 1/2   \hat{H}_{\text{SOC}}   S_2 = 1/2, 1/2 \rangle = -0.000 - 0.000i$   |
|                                                                                             |                | $\langle S_1 = 3/2, -1/2   \hat{H}_{\text{SOC}}   S_2 = 1/2, 1/2 \rangle = -0.000 - 0.000i$  |
|                                                                                             |                | $\langle S_1 = 3/2, -3/2   \hat{H}_{\text{SOC}}   S_2 = 1/2, -1/2 \rangle = 0.001 - 0.001i$  |
|                                                                                             |                | $\langle S_1 = 3/2, -1/2   \hat{H}_{\text{SOC}}   S_2 = 1/2, -1/2 \rangle = -0.000 - 0.000i$ |
|                                                                                             |                | $\langle S_1 = 3/2, 1/2   \hat{H}_{\text{SOC}}   S_2 = 1/2, -1/2 \rangle = -0.000 + 0.000i$  |
|                                                                                             | D <sub>2</sub> | $\langle S_1 = 3/2, 3/2   \hat{H}_{\text{SOC}}   S_2 = 1/2, 1/2 \rangle = -0.003 + 0.003i$   |
|                                                                                             |                | $\langle S_1 = 3/2, 1/2   \hat{H}_{\text{SOC}}   S_2 = 1/2, 1/2 \rangle = -0.000 - 0.002i$   |
|                                                                                             |                | $\langle S_1 = 3/2, -1/2   \hat{H}_{\text{SOC}}   S_2 = 1/2, 1/2 \rangle = -0.002 - 0.002i$  |
|                                                                                             |                | $\langle S_1 = 3/2, -3/2   \hat{H}_{\text{SOC}}   S_2 = 1/2, -1/2 \rangle = -0.003 - 0.003i$ |
|                                                                                             |                | $\langle S_1 = 3/2, -1/2   \hat{H}_{\text{SOC}}   S_2 = 1/2, -1/2 \rangle = -0.000 - 0.002i$ |
|                                                                                             |                | $\langle S_1 = 3/2, 1/2   \hat{H}_{\text{SOC}}   S_2 = 1/2, -1/2 \rangle = -0.002 + 0.002i$  |
|                                                                                             | D <sub>3</sub> | $\langle S_1 = 3/2, 3/2   \hat{H}_{\text{SOC}}   S_2 = 1/2, 1/2 \rangle = 0.027 - 0.044i$    |
|                                                                                             |                | $\langle S_1 = 3/2, 1/2   \hat{H}_{\text{SOC}}   S_2 = 1/2, 1/2 \rangle = -0.000 + 0.028i$   |
|                                                                                             |                | $\langle S_1 = 3/2, -1/2   \hat{H}_{\text{SOC}}   S_2 = 1/2, 1/2 \rangle = 0.015 + 0.026i$   |
| $\langle S_1 = 3/2, -3/2   \hat{H}_{\text{SOC}}   S_2 = 1/2, -1/2 \rangle = 0.027 + 0.044i$ |                |                                                                                              |
| $\langle S_1 = 3/2, -1/2   \hat{H}_{\text{SOC}}   S_2 = 1/2, -1/2 \rangle = 0.015 + -0.026$ |                |                                                                                              |
|                                                                                             |                | $\langle S_1 = 3/2, 1/2   \hat{H}_{\text{SOC}}   S_2 = 1/2, -1/2 \rangle = -0.000 + 0.028i$  |

**Table S8** Calculated Huang-Rhys factors ( $S_i$ ), reorganization energies ( $\lambda_i$ ), and derivatives of the SOC of the key normal modes on the corresponding Q<sub>1</sub> state potential surface

| Vibration freq/ $\text{cm}^{-1}$ | $S_i$ | $\lambda_i/\text{cm}^{-1}$ | $\partial\langle Q_1   \hat{H}_{\text{SOC}}   D_1 \rangle / \partial Q_k$ |
|----------------------------------|-------|----------------------------|---------------------------------------------------------------------------|
| 1245                             | 0.007 | 9.41                       | 0.066                                                                     |
| 1423                             | 0.019 | 27.19                      | 0.062                                                                     |
| 1536                             | 0.005 | 7.88                       | 0.080                                                                     |
| 1551                             | 0.007 | 11.02                      | 0.066                                                                     |
| 1623                             | 0.008 | 12.41                      | 0.051                                                                     |
| 1684                             | 0.008 | 5.51                       | 0.228                                                                     |

**Table S9** The adiabatic and vertical excitation energies (eV) of the doublet ( $D_1 - D_4$ ) of TTM-1Cz-An

| State | SCS-wB2PLYP <sup>A</sup> | DLPNO-CCSD(T) | SCS-wB2PLYP | SCS-wB2GP-PLYP | wB97X-D3 | CAM-B3LYP |
|-------|--------------------------|---------------|-------------|----------------|----------|-----------|
| $D_0$ | 0.0                      | 0.0           | 0.0         | 0.0            | 0.0      | 0.0       |
| $D_1$ | 2.506                    | 2.650         | 2.316       | 2.504          | 2.251    | 2.169     |
| $D_2$ | 2.814                    | 2.745         | 3.422       | 3.448          | 3.122    | 2.904     |
| $D_3$ | 3.082                    | 3.034         | 3.496       | 3.512          | 3.202    | 3.123     |
| $D_4$ |                          | 3.071         | 3.632       | 3.573          | 3.548    | 3.400     |

<sup>a</sup> the adiabatic excitation energy difference,  $E(D_0) = -5453.9343158$ ; others are vertical excitation energies.

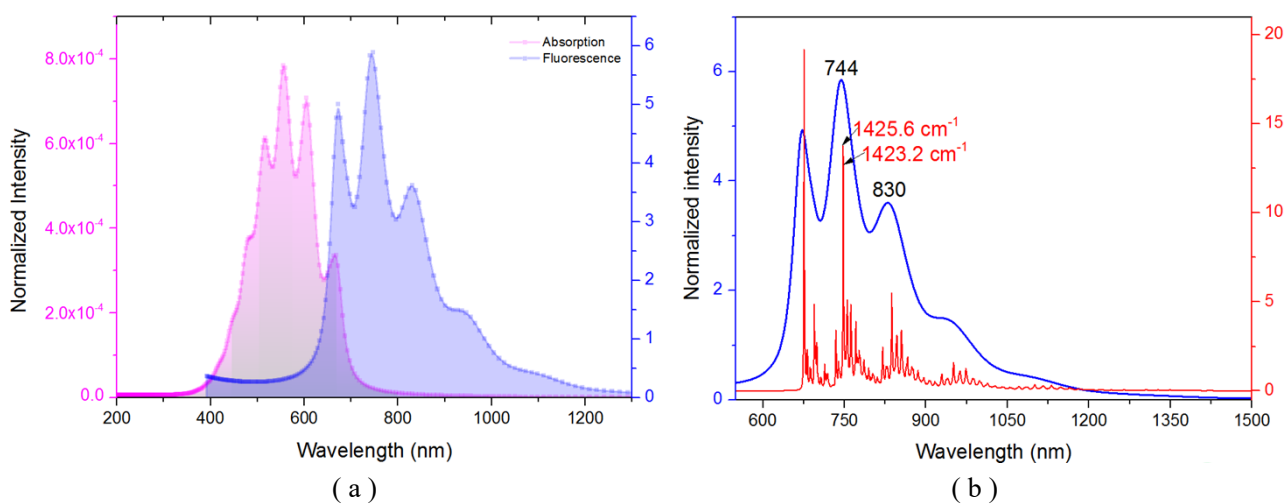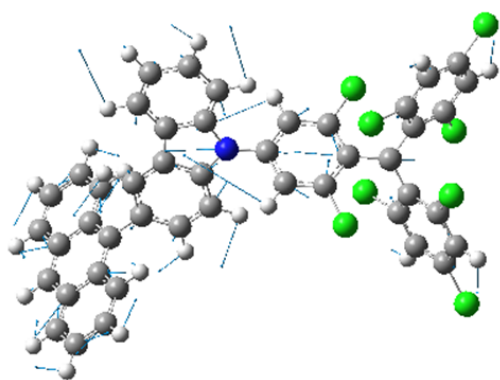

$$\omega_{170} = 1423.2 \text{ cm}^{-1}$$

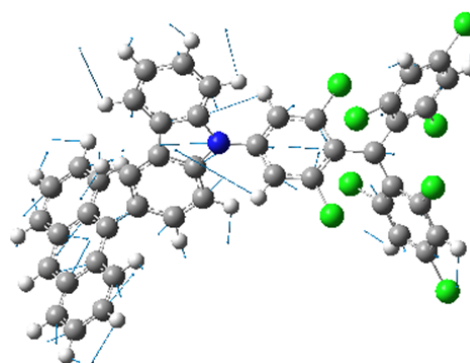

$$\omega_{171} = 1425.6 \text{ cm}^{-1}$$

**Fig. S1** Calculated absorption and fluorescence spectrum of the excited  $D_1$  state for the TTM-1Cz-An compound. The decisive promoting vibration modes for fluorescence are listed at the bottom of Figure.



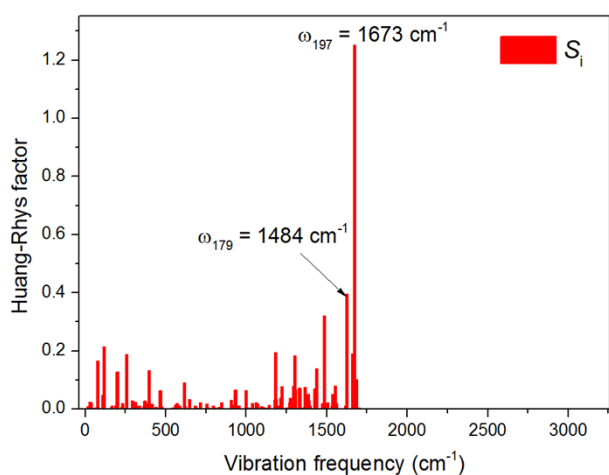

(a)

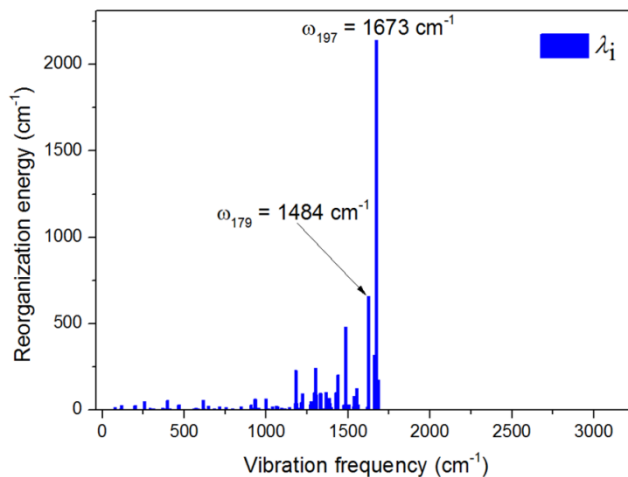

(b)

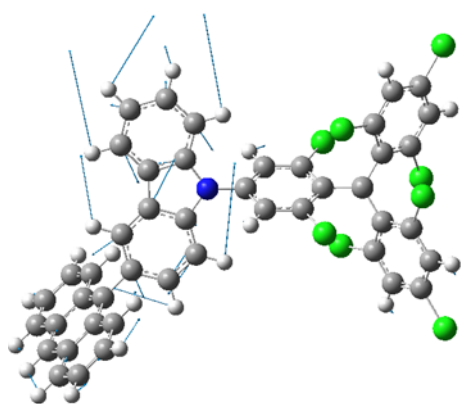

$\omega_{179} = 1484 \text{ cm}^{-1}$

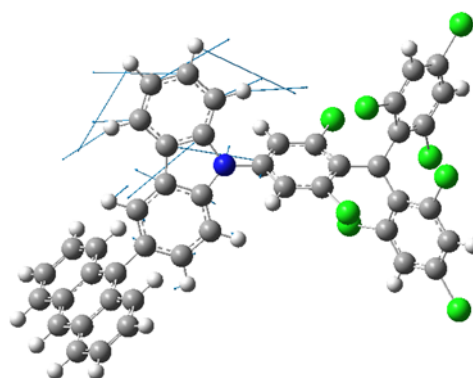

$\omega_{197} = 1673 \text{ cm}^{-1}$

**Fig. S2** Calculated Huang–Rhys factors (a) and reorganization energy (b) versus the normal vibration frequency between D<sub>1</sub> and D<sub>2</sub> on the D<sub>1</sub> potential energy surface, respectively; The vital promoting vibration modes are listed at the bottom of figure.

## Out file of the $J_{TR}$ calculation

```
=====
QD-NEVPT2 Results
(Van Vleck)
=====
```

```
*****
```

```
MULT 4
```

```
*****
```

```
Total Hamiltonian to be processed
```

```
0
```

```
0 -5456.561894
```

-----  
ROOT = 0  
-----

--- Reading QDVector (MULT= 4, ROOT= 0) Norm = 1.00000000e+00  
[uuu] 1.000000000

Total Energy Correction : dE = -8.68025142065108  
Zero Order Energy : E0 = -5447.88164262696955  
Total Energy (E0+dE) : E = -5456.56189404762063

\*\*\*\*\*

MULT 2

\*\*\*\*\*

Total Hamiltonian to be processed

|   | 0            | 1            | 2            | 3            | 4            |
|---|--------------|--------------|--------------|--------------|--------------|
| 0 | -5456.649051 | -0.000001    | 0.002694     | 0.000225     | 0.030522     |
| 1 | 0.000001     | -5456.561896 | -0.000001    | -0.000346    | 0.000002     |
| 2 | 0.002530     | -0.000001    | -5456.555530 | -0.000397    | -0.004245    |
| 3 | 0.000203     | -0.000356    | -0.000330    | -5456.609830 | 0.000108     |
| 4 | 0.021418     | -0.000000    | -0.003460    | 0.000066     | -5456.510765 |

-----  
ROOT = 0  
-----

--- Reading QDVector (MULT= 2, ROOT= 0) Norm = 1.00000000e+00  
[u20] 0.521703070  
[duu] -0.000006039  
[udu] 0.502058698  
[uud] -0.502052659  
[u02] 0.472941281

Total Energy Correction : dE = -8.67988758603860  
Zero Order Energy : E0 = -5447.97398840918231  
Total Energy (E0+dE) : E = -5456.65387599522091

-----  
ROOT = 1  
-----

--- Reading QDVector (MULT= 2, ROOT= 1) Norm = 1.00000000e+00  
[duu] 0.816482670  
[udu] -0.408264816  
[uud] -0.408217854

Total Energy Correction : dE = -8.78828704372154

Zero Order Energy : E0 = -5447.77360661343391  
 Total Energy (E0+dE) : E = -5456.56189365715545

-----  
 ROOT = 2  
 -----

--- Reading QDVector (MULT= 2, ROOT= 2) Norm = 1.00000000e+00

[u20] -0.722293945  
 [duu] 0.000177578  
 [udu] 0.051238822  
 [uud] -0.051416400  
 [u02] 0.687760044

Total Energy Correction : dE = -8.82266079685451  
 Zero Order Energy : E0 = -5447.73298112410066  
 Total Energy (E0+dE) : E = -5456.55564192095517  
 -----

**Table S10** Cartesian coordinate parameters of the optimized ground and excited state geometric structures at the  $\omega$ B97X-D3 and CAM-B3LYP levels.

| At the $\omega$ B97X-D3 level |                   |                   |                   |
|-------------------------------|-------------------|-------------------|-------------------|
| The D <sub>0</sub> state      |                   |                   |                   |
| C                             | 2.65702012955539  | -1.38559386787443 | 0.65860020966321  |
| C                             | 2.06867138219777  | -0.05368600119287 | 0.44031300884330  |
| C                             | 0.83550309431510  | 0.12302364670585  | -0.22424060843182 |
| C                             | 2.70627536778375  | 1.13053696321869  | 0.86950379232836  |
| C                             | 0.27866454419742  | 1.37466343529844  | -0.44812751654005 |
| C                             | 2.17491934236133  | 2.39298163129306  | 0.64017299452703  |
| C                             | 0.95458264123804  | 2.51759401326355  | -0.02245503283443 |
| H                             | -0.69418795809601 | 1.45766599987475  | -0.93421226940761 |
| H                             | 2.72773106467784  | 3.28017489484118  | 0.95188657278499  |
| C                             | 3.13820639656721  | -1.76950528398502 | 1.99599978142106  |
| C                             | 2.35422985004427  | -1.59337337794332 | 3.15722871592971  |
| C                             | 4.41432238770819  | -2.33815059108349 | 2.20064271724040  |
| C                             | 2.79610734329105  | -1.95380829116494 | 4.42477317397492  |
| C                             | 4.87772003459458  | -2.71550325838193 | 3.45557081976176  |
| C                             | 4.05960298803822  | -2.51789117010717 | 4.56247838153529  |
| H                             | 2.14974430703986  | -1.81102004374482 | 5.29091038423589  |
| H                             | 5.87452155134471  | -3.14297256136425 | 3.56573641045467  |

|    |                   |                   |                   |
|----|-------------------|-------------------|-------------------|
| C  | 2.75201982942624  | -2.33060807349735 | -0.46717632512151 |
| C  | 3.27483551888879  | -1.95099287329213 | -1.72333363954616 |
| C  | 2.30675168880174  | -3.66737230008518 | -0.37009020117899 |
| C  | 3.33867050729983  | -2.82014436726622 | -2.80609308718815 |
| C  | 2.36621722787060  | -4.55936608076242 | -1.43451996193520 |
| C  | 2.87907150522250  | -4.12318520141405 | -2.65124820256997 |
| H  | 3.75632444811572  | -2.48264621701264 | -3.75482704363147 |
| H  | 1.99382879537650  | -5.57718827493659 | -1.31717097659038 |
| Cl | 0.73368897184722  | -0.98147119734284 | 3.04607301429358  |
| Cl | 5.52052373017869  | -2.52186166453460 | 0.87583821939689  |
| Cl | 4.62067079991456  | -2.98150099403099 | 6.13387992862336  |
| Cl | 1.56842354048855  | -4.25073755012146 | 1.08867499619183  |
| Cl | 3.94929517425836  | -0.36883074131269 | -1.96042828122169 |
| Cl | 2.94533781147775  | -5.21628827811184 | -3.99296013431071 |
| Cl | -0.11120392682756 | -1.24927151420725 | -0.70981762819333 |
| Cl | 4.26982415461070  | 1.06689529595377  | 1.62216872814966  |
| C  | 0.10341161356405  | 4.74817535746621  | 0.70486633105042  |
| C  | 0.05279059446361  | 4.30062901519299  | -1.51424759286223 |
| C  | 0.24429036248594  | 4.68055183668232  | 2.09377193457474  |
| C  | -0.44734414588270 | 5.88467095027203  | 0.07479978728870  |
| C  | 0.19730865650357  | 3.72010465984761  | -2.77831131194766 |
| C  | -0.47799004854407 | 5.59883368700030  | -1.35061509204334 |
| C  | -0.16055218578857 | 5.78227830904570  | 2.83779307117967  |
| H  | 0.65271012673888  | 3.79421157556299  | 2.58362676612494  |
| C  | -0.84572238811024 | 6.98078690488331  | 0.84567250144612  |
| C  | -0.22115100254653 | 4.46158856575086  | -3.87788495598862 |
| H  | 0.62970937902585  | 2.72483759769240  | -2.90168197251721 |
| C  | -0.89096004356938 | 6.32581442322824  | -2.47274651362576 |
| C  | -0.70188398930505 | 6.93462625373679  | 2.23165125200154  |
| H  | -0.06175566008994 | 5.75711853419613  | 3.92635101941938  |
| H  | -1.27349651859709 | 7.86806981557058  | 0.37118071894344  |
| C  | -0.76438115493540 | 5.74961102300234  | -3.73145715447574 |
| H  | -0.12114108900670 | 4.03099978558405  | -4.87747307432012 |
| H  | -1.30418417725538 | 7.33118443684218  | -2.35891318068005 |
| H  | -1.08381635021463 | 6.30318718722164  | -4.61749997311668 |
| N  | 0.40438453540438  | 3.79323165237586  | -0.26404327151813 |
| C  | -1.12374229924934 | 8.09572462321178  | 3.07511734431344  |
| C  | -0.17974851557792 | 9.07570182863336  | 3.44573085038222  |
| C  | -2.46459679406510 | 8.20602867171892  | 3.49848506732210  |
| C  | 1.19543660053047  | 9.01006934099411  | 3.03168664403983  |
| C  | -0.58824370051117 | 10.18736730507753 | 4.25906154344885  |
| C  | -2.86514365912779 | 9.32177681026093  | 4.31038309719007  |
| C  | -3.46183257758293 | 7.23132824466045  | 3.14831448724618  |
| C  | 2.09028936204301  | 9.97204501429031  | 3.40235672696628  |

|   |                   |                   |                  |
|---|-------------------|-------------------|------------------|
| H | 1.51676735170031  | 8.17276624653136  | 2.40853384070863 |
| C | 0.38486863650846  | 11.17613202360532 | 4.62785193353747 |
| C | -1.91960389972417 | 10.28479976720097 | 4.67260714001456 |
| C | -4.23334554804805 | 9.41947859346569  | 4.73395635285503 |
| H | -3.16969307464220 | 6.37768969327240  | 2.53302137495181 |
| C | -4.75338252285146 | 7.36075729818165  | 3.57135022049027 |
| C | 1.68109112551802  | 11.07386126569681 | 4.21503913220918 |
| H | 3.13086745841566  | 9.90419373353182  | 3.07504372316153 |
| H | 0.06155119138685  | 12.01613595384064 | 5.24896575328501 |
| H | -2.22768811071495 | 11.13210904671831 | 5.29236681352378 |
| C | -5.14827847945574 | 8.47273714523755  | 4.37720466417565 |
| H | -4.52499765997537 | 10.27323308437435 | 5.35194873640875 |
| H | -5.49570902673555 | 6.60813535105358  | 3.29401047603382 |
| H | 2.41276110660298  | 11.83332854767680 | 4.50172701472356 |
| H | -6.18701272259366 | 8.55766173393176  | 4.70619783342403 |

The D<sub>1</sub> state

|    |                   |                   |                   |
|----|-------------------|-------------------|-------------------|
| C  | 2.68519486517794  | -1.34969349539651 | 0.63056759990808  |
| C  | 2.09678097787983  | -0.02394005864348 | 0.38398948997497  |
| C  | 0.81526488892786  | 0.13435932635299  | -0.18994313206421 |
| C  | 2.77510507398125  | 1.17193660090864  | 0.70966693579957  |
| C  | 0.24861511470504  | 1.38114317051264  | -0.42062869992812 |
| C  | 2.22704278417538  | 2.42757227024562  | 0.48124547036119  |
| C  | 0.95780306589514  | 2.53335991239517  | -0.08513873811947 |
| H  | -0.75690578059025 | 1.45612316254391  | -0.83684370387460 |
| H  | 2.79930322542090  | 3.32455152117714  | 0.72186679279649  |
| C  | 3.27901051037726  | -1.65673616664957 | 1.94323791270818  |
| C  | 2.60061815159305  | -1.39707438656673 | 3.15458927163147  |
| C  | 4.56619868598088  | -2.22356046849681 | 2.07134641630465  |
| C  | 3.15160779381030  | -1.67833783173671 | 4.39982559535040  |
| C  | 5.13807590253590  | -2.51973790346611 | 3.30360897766293  |
| C  | 4.42104331970217  | -2.24352257285165 | 4.46290649064508  |
| H  | 2.58555667061204  | -1.47177157719507 | 5.30830826963508  |
| H  | 6.14072843583961  | -2.94451052610687 | 3.35511194627263  |
| C  | 2.67912031402854  | -2.36805996676893 | -0.43367580534834 |
| C  | 3.11766216272278  | -2.08634061375753 | -1.74641856868300 |
| C  | 2.22942840448713  | -3.68772046860135 | -0.20829850317353 |
| C  | 3.11287536328515  | -3.03713458746879 | -2.76086307799349 |
| C  | 2.21885765320165  | -4.65891198572246 | -1.20321420717132 |
| C  | 2.66272890225755  | -4.32247336077613 | -2.47772120532440 |
| H  | 3.47372376967947  | -2.77800903599830 | -3.75643094751218 |
| H  | 1.84943317221408  | -5.66144058134546 | -0.98635665766476 |
| Cl | 0.97987508983237  | -0.77328181736514 | 3.14545806271215  |
| Cl | 5.54944948236815  | -2.50484801850221 | 0.66866493492116  |
| Cl | 5.12020285363946  | -2.60666280887310 | 6.00596912531869  |

|    |                   |                   |                   |
|----|-------------------|-------------------|-------------------|
| Cl | 1.57481177566093  | -4.14635156939682 | 1.33293377800450  |
| Cl | 3.77205607710151  | -0.52770596616591 | -2.14505712147091 |
| Cl | 2.65383189765879  | -5.52013156721109 | -3.72942290611297 |
| Cl | -0.17338037608171 | -1.24903788223167 | -0.54352222359085 |
| Cl | 4.39766475733934  | 1.13153075289924  | 1.32808602427968  |
| C  | 0.08204433329310  | 4.74073743633372  | 0.67101170005053  |
| C  | 0.02196524571881  | 4.32402750822617  | -1.55312502202448 |
| C  | 0.24096418920150  | 4.65463372519082  | 2.05725165948884  |
| C  | -0.49073320384212 | 5.87804171252677  | 0.06176500770647  |
| C  | 0.16494793706122  | 3.76021210423452  | -2.82489486913968 |
| C  | -0.52562132923426 | 5.61283852665103  | -1.36783035495013 |
| C  | -0.16837027928063 | 5.74099464024465  | 2.82063836554194  |
| H  | 0.66575269698195  | 3.76588444963482  | 2.52896030266610  |
| C  | -0.89794546784102 | 6.95627411595607  | 0.85243060384873  |
| C  | -0.26438206016071 | 4.51362808312840  | -3.91235603752481 |
| H  | 0.60288770711392  | 2.76888945604018  | -2.96175583127318 |
| C  | -0.95121748573621 | 6.35066772047677  | -2.47822698975375 |
| C  | -0.73471229924481 | 6.89565442554316  | 2.23757540021334  |
| H  | -0.05559006859995 | 5.70270494216223  | 3.90751352226538  |
| H  | -1.34283591084299 | 7.84363930039172  | 0.39409002580394  |
| C  | -0.81926065382555 | 5.79461010930155  | -3.74571595124765 |
| H  | -0.16322698941084 | 4.09906024418877  | -4.91861874209911 |
| H  | -1.37593237997756 | 7.34931355519614  | -2.34821417479933 |
| H  | -1.14389932892901 | 6.35881814967892  | -4.62315478876850 |
| N  | 0.38955634937596  | 3.80565438345895  | -0.31307937265238 |
| C  | -1.15412824953274 | 8.03721630838212  | 3.09392619067997  |
| C  | -0.15148913759296 | 8.92672252151797  | 3.63217680372446  |
| C  | -2.55653483008052 | 8.24477481551483  | 3.36982780950601  |
| C  | 1.21569666172359  | 8.76036418416592  | 3.37178983810760  |
| C  | -0.56150312024368 | 10.03568736821472 | 4.44556787582637  |
| C  | -2.95360903794252 | 9.36321975438438  | 4.17682624651308  |
| C  | -3.55134452954296 | 7.38170780623782  | 2.88987059620103  |
| C  | 2.17702550926213  | 9.64479134916856  | 3.90309236931865  |
| H  | 1.54307187609780  | 7.93074173190870  | 2.74162787357125  |
| C  | 0.41080392408352  | 10.90313706508421 | 4.96209864426467  |
| C  | -1.95161613155048 | 10.23487945493092 | 4.69915075225852  |
| C  | -4.31469882810200 | 9.56745373123623  | 4.44190075747926  |
| H  | -3.26463696118963 | 6.51579102392360  | 2.28952794379740  |
| C  | -4.91512007348161 | 7.60564307672754  | 3.17047792256555  |
| C  | 1.77935377083752  | 10.70771444619327 | 4.69460431720544  |
| H  | 3.23470906134367  | 9.48370465721961  | 3.68135976250307  |
| H  | 0.09148234573453  | 11.74685493713533 | 5.58013973533787  |
| H  | -2.25927171037968 | 11.08351635857855 | 5.31602446773959  |
| C  | -5.29584379689809 | 8.69150012581654  | 3.93886966281667  |

|                          |                   |                   |                   |
|--------------------------|-------------------|-------------------|-------------------|
| H                        | -4.61054560869710 | 10.42381203580986 | 5.05421156546115  |
| H                        | -5.66389292237741 | 6.91385326302602  | 2.77730541993247  |
| H                        | 2.51722726885343  | 11.39840800864717 | 5.10980806977602  |
| H                        | -6.35015646756517 | 8.87277888786956  | 4.16125432580680  |
| The D <sub>2</sub> state |                   |                   |                   |
| C                        | 2.70803825574413  | -1.37086713891624 | 0.63913656741971  |
| C                        | 2.07094339508816  | -0.10723238749929 | 0.43185917252394  |
| C                        | 0.85929763619957  | 0.05972419089765  | -0.36829527940824 |
| C                        | 2.56655172340597  | 1.14657141118841  | 0.99392307217295  |
| C                        | 0.26848649102298  | 1.27356491482044  | -0.59764565051303 |
| C                        | 1.94222338085484  | 2.35096310296965  | 0.81246368726089  |
| C                        | 0.78795188880759  | 2.44765134123804  | -0.00311765002286 |
| H                        | -0.65634614615210 | 1.31923936590219  | -1.17426852433170 |
| H                        | 2.39342331619592  | 3.25539035486281  | 1.22278468076468  |
| C                        | 3.21557307462603  | -1.72906491927917 | 1.95999106126900  |
| C                        | 2.46275892851533  | -1.49805639420215 | 3.14090004387382  |
| C                        | 4.48995347260418  | -2.31487906526243 | 2.18395752403883  |
| C                        | 2.92139766273989  | -1.78695863505858 | 4.42042432123918  |
| C                        | 4.96385108459090  | -2.63947349999088 | 3.44763021448329  |
| C                        | 4.17487548137065  | -2.37010279612724 | 4.56424142368603  |
| H                        | 2.29641012003167  | -1.58136457725447 | 5.28972523671817  |
| H                        | 5.95741302323131  | -3.07345941594402 | 3.56318057007570  |
| C                        | 2.85781792062088  | -2.30389223834067 | -0.47355494922990 |
| C                        | 3.26975524995941  | -1.87367189617832 | -1.76178424318010 |
| C                        | 2.59244924693123  | -3.69574990906893 | -0.37882325192696 |
| C                        | 3.38830273635893  | -2.71781940507406 | -2.85917727198286 |
| C                        | 2.72672489657239  | -4.56782313966104 | -1.45044005104110 |
| C                        | 3.12329197186759  | -4.07181011405742 | -2.69103419015348 |
| H                        | 3.70758163674898  | -2.32479353886526 | -3.82465759107589 |
| H                        | 2.49434084529209  | -5.62563230539366 | -1.32432052616894 |
| Cl                       | 0.85488576149109  | -0.84927672536463 | 3.01057264525301  |
| Cl                       | 5.58698089883077  | -2.57001786816913 | 0.85958982275343  |
| Cl                       | 4.76667667459135  | -2.76249029902509 | 6.14720333705651  |
| Cl                       | 1.98253636349806  | -4.37650965403041 | 1.09970647931866  |
| Cl                       | 3.69094498599833  | -0.20452324246149 | -2.00711379772016 |
| Cl                       | 3.27934174815059  | -5.15372784386260 | -4.03825111942340 |
| Cl                       | 0.06777765015507  | -1.34454006485490 | -0.99100392459522 |
| Cl                       | 4.07292488275178  | 1.14900580939209  | 1.84240540257661  |
| C                        | -0.07353581387559 | 4.65566567998808  | 0.74453739324098  |
| C                        | -0.18431161324440 | 4.19618029116578  | -1.48112656206773 |
| C                        | 0.06109813928862  | 4.58235733743061  | 2.13325393473099  |
| C                        | -0.61059364380640 | 5.79834510152204  | 0.11778771913718  |
| C                        | -0.04735812081025 | 3.62610753745228  | -2.74941380065143 |
| C                        | -0.68573283401775 | 5.50308419835139  | -1.30726406405488 |

|                 |                   |                   |                   |
|-----------------|-------------------|-------------------|-------------------|
| C               | -0.29861793905251 | 5.70300432715610  | 2.87591727767383  |
| H               | 0.42130424869976  | 3.67976518022403  | 2.63020303161110  |
| C               | -0.96457686134092 | 6.90956475965182  | 0.88159312521711  |
| C               | -0.46765533881059 | 4.38093431666512  | -3.84179365886432 |
| H               | 0.38808473256254  | 2.63555089754671  | -2.89149461913438 |
| C               | -1.10050497529230 | 6.24277580342385  | -2.41577145670305 |
| C               | -0.79645107860672 | 6.87176652758998  | 2.26864460723033  |
| H               | -0.19592228852331 | 5.67713886685013  | 3.96382999468913  |
| H               | -1.37273688466829 | 7.80527341936226  | 0.40618000156549  |
| C               | -0.99596968178047 | 5.67042230527597  | -3.68114152603159 |
| H               | -0.37401273404006 | 3.95875227415426  | -4.84519279289234 |
| H               | -1.49124373855902 | 7.25565491534170  | -2.29170409676468 |
| H               | -1.31415807196486 | 6.23572510130663  | -4.56007344999648 |
| N               | 0.18951657451084  | 3.68000776414924  | -0.22857045243925 |
| C               | -1.14234170525691 | 8.06824018448904  | 3.09605636607427  |
| C               | -0.11608901245679 | 8.93120813822374  | 3.53588950990504  |
| C               | -2.48817533605693 | 8.34033519645425  | 3.41971410221922  |
| C               | 1.26843052401988  | 8.70168417804147  | 3.22301874290161  |
| C               | -0.44821355529765 | 10.09183187358439 | 4.31453596747991  |
| C               | -2.81103675457476 | 9.50822961796602  | 4.19200936032105  |
| C               | -3.56700306287745 | 7.48249728474090  | 3.00989064611404  |
| C               | 2.24156385294694  | 9.55307544130770  | 3.66112489119257  |
| H               | 1.53626726271784  | 7.82964474025517  | 2.62289655186195  |
| C               | 0.60563758291731  | 10.96143059177538 | 4.75554301920614  |
| C               | -1.78593261332928 | 10.35545299002530 | 4.62122960461406  |
| C               | -4.18525901881068 | 9.77887843719873  | 4.50736245117136  |
| H               | -3.33575352613840 | 6.58328360758515  | 2.43506427890594  |
| C               | -4.86144829640081 | 7.77409058610278  | 3.33202106657069  |
| C               | 1.90788187608362  | 10.70134091244629 | 4.44325410195659  |
| H               | 3.28756670892131  | 9.35871034648799  | 3.41118521526858  |
| H               | 0.33861991768036  | 11.84037816238008 | 5.34875738366727  |
| H               | -2.03578931552741 | 11.24372050036634 | 5.20893041685294  |
| C               | -5.17905710738790 | 8.94255784984596  | 4.09083203668459  |
| H               | -4.41676461680659 | 10.67362208782017 | 5.09185491141465  |
| H               | -5.66618972440530 | 7.10831296458459  | 3.01032872242886  |
| H               | 2.70145514937984  | 11.36983848949937 | 4.78610208416846  |
| H               | -6.22137256470425 | 9.15932479688166  | 4.33734172181345  |
| The $Q_1$ state |                   |                   |                   |
| C               | 2.70461358349180  | -1.38972079346873 | 0.66657739093537  |
| C               | 2.09068783953493  | -0.06232300260145 | 0.49644045727573  |
| C               | 0.81537057392725  | 0.10196853620266  | -0.08682548939737 |
| C               | 2.74850117928574  | 1.12819380693182  | 0.87395975698630  |
| C               | 0.24544013423612  | 1.34920877540240  | -0.29926416534150 |
| C               | 2.20225543057784  | 2.38697644077181  | 0.65618407957930  |



|    |                   |                   |                   |
|----|-------------------|-------------------|-------------------|
| C  | 0.94753133698423  | 2.49936348342850  | 0.05938008911465  |
| H  | -0.75339253679353 | 1.42524848423009  | -0.73089388566443 |
| H  | 2.77142510036123  | 3.27942572841179  | 0.91981574615501  |
| C  | 3.28284010092847  | -1.78260224195426 | 1.96178514290752  |
| C  | 2.57958271940818  | -1.62912674067021 | 3.17658262542878  |
| C  | 4.57458696069396  | -2.34314306967633 | 2.06939497323504  |
| C  | 3.11128431947968  | -2.00225901074582 | 4.40555048021858  |
| C  | 5.12761470821294  | -2.73132086677508 | 3.28395092112248  |
| C  | 4.38628863545209  | -2.55588311430522 | 4.44716248015448  |
| H  | 2.52535751148152  | -1.87903366429187 | 5.31653742784119  |
| H  | 6.13325734414277  | -3.15054805393910 | 3.31965341474854  |
| C  | 2.73403817541595  | -2.32244102526970 | -0.47389835944500 |
| C  | 3.17785228077002  | -1.92887873912034 | -1.75555347717918 |
| C  | 2.30547526237590  | -3.66321588459044 | -0.36123730126083 |
| C  | 3.19033084361804  | -2.79146000957274 | -2.84532688916654 |
| C  | 2.31221258783622  | -4.54829582969332 | -1.43304604399907 |
| C  | 2.75409398451339  | -4.10033434533424 | -2.67315000231387 |
| H  | 3.55275228423152  | -2.44508254293374 | -3.81335405655567 |
| H  | 1.95659341778002  | -5.57035937903793 | -1.30139493768795 |
| Cl | 0.94868723887237  | -1.03523477140993 | 3.18434629061391  |
| Cl | 5.58564959845984  | -2.50286150104020 | 0.66787205769344  |
| Cl | 5.06029917974951  | -3.03624510963681 | 5.96845980366462  |
| Cl | 1.65670664808226  | -4.26024187079307 | 1.13381012018038  |
| Cl | 3.81869715262096  | -0.33724565742064 | -2.02207061345229 |
| Cl | 2.76042189383941  | -5.18493554060889 | -4.02340386890369 |
| Cl | -0.15640583302672 | -1.27959933965526 | -0.48859284231464 |
| Cl | 4.35399232240648  | 1.07683642778270  | 1.53339823296441  |
| C  | 0.09945383184697  | 4.74374023799708  | 0.75787703566319  |
| C  | -0.01838138529046 | 4.23311202128595  | -1.44481367436105 |
| C  | 0.29506324718323  | 4.72203179337839  | 2.14177135404039  |
| C  | -0.50106771631839 | 5.84857970882915  | 0.11646143013303  |
| C  | 0.09751278117881  | 3.62035363934119  | -2.69651290976398 |
| C  | -0.57263732983132 | 5.52316437644683  | -1.29886691765680 |
| C  | -0.10834807567531 | 5.83564838635769  | 2.86834861248993  |
| H  | 0.74377013048011  | 3.86080795930470  | 2.64122672178306  |
| C  | -0.90302500002013 | 6.95453948579961  | 0.86964313733817  |
| C  | -0.37357459721448 | 4.32150452673192  | -3.80121040151683 |
| H  | 0.54808602509115  | 2.63159682786943  | -2.80657766795555 |
| C  | -1.03886578451369 | 6.20937229884229  | -2.42568133304345 |
| C  | -0.70762241444928 | 6.95598602892622  | 2.25206527673262  |
| H  | 0.03259112258187  | 5.84491674227074  | 3.95255050332266  |
| H  | -1.37281199598452 | 7.81443437620280  | 0.38442800249632  |
| C  | -0.94050229771378 | 5.60113294246757  | -3.67173412137105 |
| H  | -0.29614507879809 | 3.86590591728387  | -4.79165047834525 |

|   |                   |                   |                   |
|---|-------------------|-------------------|-------------------|
| H | -1.47047581292466 | 7.20841411518222  | -2.32543343784814 |
| H | -1.30202626664158 | 6.12196118576896  | -4.56142801747618 |
| N | 0.38669548747496  | 3.76865381942624  | -0.19398315701820 |
| C | -1.13577826825584 | 8.12119450033646  | 3.06863357524098  |
| C | -0.13523831200313 | 9.03791244662136  | 3.59126257019438  |
| C | -2.55159111435274 | 8.33488234685900  | 3.32576977657951  |
| C | 1.22648371029012  | 8.87565616620841  | 3.33999188673836  |
| C | -0.55701612886797 | 10.16541201191985 | 4.37463048461062  |
| C | -2.95816550347445 | 9.47168485641501  | 4.10407403069585  |
| C | -3.53467591642975 | 7.46230310664162  | 2.86056743349688  |
| C | 2.18129012451924  | 9.78188052906562  | 3.85117174634177  |
| H | 1.56248723115739  | 8.03368237874898  | 2.73102208375316  |
| C | 0.40112790055438  | 11.04889077809205 | 4.87145367162414  |
| C | -1.95777015769626 | 10.36468803113383 | 4.61589630939807  |
| C | -4.31467722402656 | 9.67757349737362  | 4.35530169043557  |
| H | -3.24321311910362 | 6.58299386206930  | 2.28237930478500  |
| C | -4.90323425819073 | 7.68835107167936  | 3.12549069440099  |
| C | 1.77398220305780  | 10.85822566164683 | 4.61346767422714  |
| H | 3.24067274990859  | 9.62312303790443  | 3.63570054974156  |
| H | 0.07360667576636  | 11.90525567452795 | 5.46758254173568  |
| H | -2.27326556113360 | 11.22604976333020 | 5.21055375607336  |
| C | -5.29171526568537 | 8.78734778668704  | 3.86484302638178  |
| H | -4.61689878756806 | 10.54517997048669 | 4.94856132667102  |
| H | -5.64662067753376 | 6.98447168743985  | 2.74353706050651  |
| H | 2.50467268297894  | 11.56601346404757 | 5.01240217719251  |
| H | -6.34803883332289 | 8.97068040243539  | 4.07592811339449  |

At the CAM-B3LYP level

The D<sub>0</sub> state

|   |                   |                   |                   |
|---|-------------------|-------------------|-------------------|
| C | 2.64454999424893  | -1.36936980626656 | 0.61447562526844  |
| C | 2.05226367277582  | -0.04904476115551 | 0.34544224747184  |
| C | 0.86892731516852  | 0.11452765036344  | -0.40656485614526 |
| C | 2.61966187392863  | 1.14679261292649  | 0.83655638274089  |
| C | 0.28258350957924  | 1.35225595941828  | -0.62953334737393 |
| C | 2.06071025506070  | 2.39513198008402  | 0.60826809172238  |
| C | 0.87705318194761  | 2.50613863568154  | -0.12032214430644 |
| H | -0.65832528318136 | 1.40835778477185  | -1.17507136962054 |
| H | 2.56709546916331  | 3.28446192770066  | 0.98053190749523  |
| C | 3.01850622186026  | -1.73396654427214 | 1.99373432959200  |
| C | 2.12481316962635  | -1.59940496916555 | 3.07720687627355  |
| C | 4.29573808808767  | -2.23587530331086 | 2.32114264496876  |
| C | 2.46544994848241  | -1.93319046512891 | 4.38146997050291  |
| C | 4.66043395203838  | -2.58307910618188 | 3.61537493834749  |
| C | 3.73757008749428  | -2.42640245676940 | 4.64156952162339  |
| H | 1.73497609725873  | -1.82311335525108 | 5.18161662064842  |

|    |                   |                   |                   |
|----|-------------------|-------------------|-------------------|
| H  | 5.66402646883394  | -2.95376457224810 | 3.81889511790890  |
| C  | 2.86537961544208  | -2.32670656068397 | -0.48294021080095 |
| C  | 3.52020703560212  | -1.96353727464742 | -1.67968037284305 |
| C  | 2.44243859275489  | -3.67164455423373 | -0.40940529766846 |
| C  | 3.74119982323625  | -2.85666235254426 | -2.71979101747362 |
| C  | 2.65660155893167  | -4.58641602735490 | -1.43213843572487 |
| C  | 3.30765170352524  | -4.16947315501649 | -2.58585636811295 |
| H  | 4.26414911073075  | -2.53052080270043 | -3.61762847470977 |
| H  | 2.29990759787875  | -5.61047389620078 | -1.33193882474191 |
| Cl | 0.48942388554463  | -1.07427898833521 | 2.81496013857470  |
| Cl | 5.53158979637311  | -2.36461971066526 | 1.10722270634602  |
| Cl | 4.17773370622922  | -2.84937237077642 | 6.26350416599185  |
| Cl | 1.53756057251706  | -4.24338661646158 | 0.95908576909199  |
| Cl | 4.17132330995526  | -0.36552935467344 | -1.88254264456295 |
| Cl | 3.58138312254018  | -5.29899768321928 | -3.87117764403227 |
| Cl | 0.00715775261845  | -1.26892862384806 | -1.01124931045712 |
| Cl | 4.13812059567336  | 1.12470156214214  | 1.68273274518946  |
| C  | 0.02329849236623  | 4.71904042935179  | 0.65414738805434  |
| C  | -0.09487850624061 | 4.29816072972524  | -1.56834348460966 |
| C  | 0.19739041161136  | 4.64393694970402  | 2.03725244120364  |
| C  | -0.53771049315243 | 5.86518408372049  | 0.05312629126426  |
| C  | 0.00810847286285  | 3.74430318475260  | -2.84645332488649 |
| C  | -0.61267486474569 | 5.59682085915089  | -1.37047085334236 |
| C  | -0.17459768937371 | 5.74340003996831  | 2.80014637429326  |
| H  | 0.60660316846836  | 3.75370607664043  | 2.51521778667894  |
| C  | -0.90261336386085 | 6.95849263266293  | 0.84199281804513  |
| C  | -0.43742200005773 | 4.50626590351750  | -3.92017655519125 |
| H  | 0.42926827760389  | 2.75141244051920  | -3.00608083285147 |
| C  | -1.05393690042672 | 6.34419923127580  | -2.46561833636108 |
| C  | -0.71762594271381 | 6.90749632254258  | 2.22214583353756  |
| H  | -0.04346020838716 | 5.70541201911768  | 3.88380242557374  |
| H  | -1.33246673712163 | 7.85109951857525  | 0.38193074609901  |
| C  | -0.96866599775842 | 5.79191527500322  | -3.73682745280722 |
| H  | -0.36811338993420 | 4.09269491493993  | -4.92866077594856 |
| H  | -1.45585766498742 | 7.34946156883747  | -2.32143846830156 |
| H  | -1.31153899252682 | 6.36209207106409  | -4.60238234270789 |
| N  | 0.29139469081866  | 3.76946418734463  | -0.33400970882939 |
| C  | -1.08693855353579 | 8.07122559281968  | 3.08602555429978  |
| C  | -0.11521723643245 | 9.04020053651537  | 3.41144248016397  |
| C  | -2.40230910826258 | 8.19604762202171  | 3.57864771061465  |
| C  | 1.23596750204885  | 8.96329487203143  | 2.93499155901695  |
| C  | -0.47059207789279 | 10.15500273536490 | 4.24659626302303  |
| C  | -2.74845683949116 | 9.31450782444653  | 4.41308660387467  |
| C  | -3.42804902281593 | 7.23761924293467  | 3.28217730265406  |

|                          |                   |                   |                   |
|--------------------------|-------------------|-------------------|-------------------|
| C                        | 2.15749330341682  | 9.91473991714757  | 3.26355284542762  |
| H                        | 1.52095661833820  | 8.12558465286048  | 2.29787166788253  |
| C                        | 0.52704117334733  | 11.13125641667022 | 4.56773040324662  |
| C                        | -1.77631962225332 | 10.26518705698932 | 4.72644276974573  |
| C                        | -4.08812630469304 | 9.42698021657617  | 4.90732221780801  |
| H                        | -3.18144944516080 | 6.38302564235243  | 2.65134444194541  |
| C                        | -4.69311867620431 | 7.38041397573079  | 3.77387204801647  |
| C                        | 1.80025032286502  | 11.01783496504074 | 4.09366450673248  |
| H                        | 3.18016801140003  | 9.83512006639967  | 2.88834006960318  |
| H                        | 0.24090937859847  | 11.97227099114244 | 5.20400388229924  |
| H                        | -2.04327473703402 | 11.11369649449538 | 5.36163229175615  |
| C                        | -5.03188666946143 | 8.49255452380774  | 4.59972354072227  |
| H                        | -4.33553361685229 | 10.28269630232766 | 5.54017219694979  |
| H                        | -5.45699748498308 | 6.63712498445060  | 3.53525609263805  |
| H                        | 2.55181782396686  | 11.76924817417763 | 4.34529781833103  |
| H                        | -6.04994230327933 | 8.58933895330535  | 4.98310728315116  |
| The D <sub>1</sub> state |                   |                   |                   |
| C                        | 2.73265002506244  | -1.34472974598514 | 0.62441929628572  |
| C                        | 2.09676850398703  | -0.03868797772520 | 0.38714420373209  |
| C                        | 0.83778123532602  | 0.08731710890412  | -0.23864958100401 |
| C                        | 2.70156386451713  | 1.17769298608607  | 0.77086960140321  |
| C                        | 0.22597421421801  | 1.31286331083782  | -0.45831496601719 |
| C                        | 2.11220451467514  | 2.41388623852794  | 0.54956741014261  |
| C                        | 0.86383247656594  | 2.48857059669972  | -0.06604847664202 |
| H                        | -0.76429747054685 | 1.34568151486200  | -0.91070126120243 |
| H                        | 2.64405104239931  | 3.32102524757675  | 0.83359393538016  |
| C                        | 3.26443652463011  | -1.67474754730110 | 1.95822944094377  |
| C                        | 2.50475084619227  | -1.50746812505630 | 3.13591830128217  |
| C                        | 4.56757394778098  | -2.18337764643740 | 2.14595153520600  |
| C                        | 2.99231096126920  | -1.81908122635395 | 4.39835118319145  |
| C                        | 5.07735127250210  | -2.50845433365948 | 3.39608057893859  |
| C                        | 4.28128653160092  | -2.32227650617863 | 4.51882738958580  |
| H                        | 2.36080424464379  | -1.68602226874456 | 5.27554898850174  |
| H                        | 6.09437179535532  | -2.88642192559437 | 3.48966123536185  |
| C                        | 2.83697636694948  | -2.32428330652307 | -0.47112311268733 |
| C                        | 3.34867848028282  | -1.98294867067752 | -1.74153033535537 |
| C                        | 2.43349646194767  | -3.66865337846604 | -0.32261510259090 |
| C                        | 3.45284185962616  | -2.89598434488392 | -2.78264533889787 |
| C                        | 2.53217652210995  | -4.60290574851072 | -1.34522276663911 |
| C                        | 3.04266168931208  | -4.20656146649326 | -2.57455433233762 |
| H                        | 3.86820218128273  | -2.58679287737820 | -3.74068472220080 |
| H                        | 2.19455588141520  | -5.62569856677072 | -1.18447833467193 |
| Cl                       | 0.85418833109573  | -0.97039169138359 | 3.05714561953346  |
| Cl                       | 5.65369967795858  | -2.35348133089180 | 0.80065070536006  |

|    |                   |                   |                   |
|----|-------------------|-------------------|-------------------|
| Cl | 4.90276491742326  | -2.72234332224003 | 6.08613079488973  |
| Cl | 1.69757150620339  | -4.21516600346045 | 1.15339893366029  |
| Cl | 3.96646337099295  | -0.38805425222501 | -2.04870559372141 |
| Cl | 3.16861613489257  | -5.35935401747279 | -3.86206146224715 |
| Cl | -0.07796870236960 | -1.32378648196017 | -0.67659100286055 |
| Cl | 4.29821838753259  | 1.19372845229644  | 1.45808301697492  |
| C  | 0.00978342306947  | 4.71141017912874  | 0.68144062146302  |
| C  | -0.21376149490008 | 4.21495288460126  | -1.51597861695031 |
| C  | 0.26215428091739  | 4.68649808499298  | 2.05444520889258  |
| C  | -0.61912064304024 | 5.82017079805292  | 0.07674311013440  |
| C  | -0.16305474043574 | 3.61841069480432  | -2.77769110163622 |
| C  | -0.75914874241487 | 5.50422177643907  | -1.33238046430016 |
| C  | -0.10497697058749 | 5.79671073237289  | 2.80234884600534  |
| H  | 0.72521198944370  | 3.82409323549100  | 2.53489829044142  |
| C  | -0.98360529892699 | 6.92255079935858  | 0.85132477351743  |
| C  | -0.68663888504554 | 4.32997691408742  | -3.85064251530652 |
| H  | 0.27570007748996  | 2.63094468198748  | -2.92408992867718 |
| C  | -1.27965908737394 | 6.20023328797617  | -2.42659006757264 |
| C  | -0.72562715313338 | 6.92463922142344  | 2.22344352209256  |
| H  | 0.08337112664931  | 5.79537148310893  | 3.87803932576975  |
| H  | -1.46940972472079 | 7.78367807200802  | 0.38722529549165  |
| C  | -1.24415082706437 | 5.60654413821938  | -3.68152826087682 |
| H  | -0.65934807515724 | 3.88362087580973  | -4.84710627213081 |
| H  | -1.70373544653554 | 7.19813710488738  | -2.29516951128426 |
| H  | -1.64743166423849 | 6.13732401377556  | -4.54610516532301 |
| N  | 0.25275414290369  | 3.73943967260945  | -0.28848020898624 |
| C  | -1.10412461857059 | 8.08641880565550  | 3.06820038689784  |
| C  | -0.07036266280261 | 8.90646170644152  | 3.65887366062693  |
| C  | -2.50062769697471 | 8.38105567724541  | 3.29907147869686  |
| C  | 1.29357815660755  | 8.68274670474593  | 3.43215940350316  |
| C  | -0.44244703472416 | 10.01546222781047 | 4.49019784120088  |
| C  | -2.85442954077488 | 9.50462500008524  | 4.11917188691081  |
| C  | -3.53675264334682 | 7.59764582045963  | 2.77483775379174  |
| C  | 2.28302696405766  | 9.49600004614698  | 4.01926840010977  |
| H  | 1.60092163963631  | 7.86346462694453  | 2.78240528819853  |
| C  | 0.55742313025732  | 10.81038817661837 | 5.06459327499247  |
| C  | -1.82217578265923 | 10.29245191691282 | 4.70160592312879  |
| C  | -4.20622194961437 | 9.79264599855289  | 4.34546542232200  |
| H  | -3.29391487511073 | 6.72364172913949  | 2.17090306043000  |
| C  | -4.89031724761547 | 7.90621675737013  | 3.01486725774774  |
| C  | 1.91965809172426  | 10.55115342705875 | 4.83436273549770  |
| H  | 3.33607509798052  | 9.28575476804173  | 3.82130139146165  |
| H  | 0.26166205029174  | 11.64973687704340 | 5.69844274548140  |
| H  | -2.09884915323208 | 11.14125375305331 | 5.33095422317316  |

|                          |                   |                   |                   |
|--------------------------|-------------------|-------------------|-------------------|
| C                        | -5.22565626215667 | 8.99884260169469  | 3.79158572828493  |
| H                        | -4.46271329096340 | 10.65135707531771 | 4.97044995269449  |
| H                        | -5.66830784358077 | 7.27261318355106  | 2.58408678972310  |
| H                        | 2.67943324362948  | 11.18630740607683 | 5.29439840521160  |
| H                        | -6.27198665579163 | 9.24587336948118  | 3.98255532785246  |
| The D <sub>2</sub> state |                   |                   |                   |
| C                        | 2.66408818766995  | -1.38636486037391 | 0.63929111363840  |
| C                        | 2.07355527968971  | -0.09678215764630 | 0.41631356710875  |
| C                        | 0.89961390663503  | 0.11501996754926  | -0.41268914290385 |
| C                        | 2.58734107729895  | 1.13264910341609  | 0.99477615342613  |
| C                        | 0.35121674748263  | 1.34646251974035  | -0.65089162021416 |
| C                        | 2.01589476462078  | 2.36098351645691  | 0.79702798910650  |
| C                        | 0.88904605237087  | 2.50328106075328  | -0.04354472369585 |
| H                        | -0.55740233542706 | 1.41440189220541  | -1.24732441857949 |
| H                        | 2.49233165939598  | 3.24114367714998  | 1.22622293775704  |
| C                        | 3.09111322066477  | -1.77483245538390 | 1.97808939999059  |
| C                        | 2.29908954008430  | -1.52530918596348 | 3.12859065294560  |
| C                        | 4.32196698462595  | -2.42471955100320 | 2.25823760509562  |
| C                        | 2.67710296363045  | -1.86161257333598 | 4.42045329043005  |
| C                        | 4.71555434492889  | -2.79542576474623 | 3.53490438275810  |
| C                        | 3.88882943889476  | -2.50987220791830 | 4.61672754237704  |
| H                        | 2.01772878045126  | -1.64347880205158 | 5.25938331033680  |
| H                        | 5.67891402394338  | -3.28037639469545 | 3.68689706468410  |
| C                        | 2.83614922717045  | -2.31377088089177 | -0.47268916019148 |
| C                        | 3.31969157115622  | -1.89635960464170 | -1.73973913547619 |
| C                        | 2.53478948922869  | -3.69952772032712 | -0.40163883200258 |
| C                        | 3.47654944678780  | -2.74118301781613 | -2.82907651657145 |
| C                        | 2.70483149564305  | -4.57276561130506 | -1.46512553952537 |
| C                        | 3.17528463671624  | -4.08821706403713 | -2.68124482708884 |
| H                        | 3.85578172109768  | -2.35361679874432 | -3.77361667983896 |
| H                        | 2.44256628265116  | -5.62384841804019 | -1.35170231315649 |
| Cl                       | 0.72905853101209  | -0.79630234766458 | 2.94354375557385  |
| Cl                       | 5.47650863526544  | -2.71601212430908 | 0.98839050862774  |
| Cl                       | 4.37826655748689  | -2.96327223260246 | 6.21936521644215  |
| Cl                       | 1.82760597101153  | -4.37827098148044 | 1.03670784569587  |
| Cl                       | 3.79856841877781  | -0.23815111960133 | -1.96832838036422 |
| Cl                       | 3.38078900856000  | -5.17330999248149 | -4.02085515912651 |
| Cl                       | 0.07253603243793  | -1.25594784394605 | -1.07357308582288 |
| Cl                       | 4.05799820132033  | 1.08659683803872  | 1.90908454105622  |
| C                        | 0.06765954131523  | 4.72797061082040  | 0.70536127051120  |
| C                        | -0.09256983507783 | 4.25435620421005  | -1.51208678360652 |
| C                        | 0.23982237303461  | 4.67158179849952  | 2.08867012546863  |
| C                        | -0.51134958955925 | 5.85502840917685  | 0.08765156672485  |
| C                        | 0.01891483502554  | 3.68281694355005  | -2.78037172395587 |

|                 |                   |                   |                   |
|-----------------|-------------------|-------------------|-------------------|
| C               | -0.61461738470258 | 5.55232344352959  | -1.33180184329361 |
| C               | -0.13554397010095 | 5.78404158762276  | 2.83402855371366  |
| H               | 0.63783016822520  | 3.78694787752404  | 2.58468579714816  |
| C               | -0.88475218159752 | 6.95477115076560  | 0.85316133427646  |
| C               | -0.44842788284415 | 4.42087568788824  | -3.86380853167598 |
| H               | 0.46845930809217  | 2.70205532087131  | -2.93187135180122 |
| C               | -1.07233669805949 | 6.27621566087544  | -2.42918716329020 |
| C               | -0.68968821200879 | 6.93032824164511  | 2.23755091909477  |
| H               | -0.00619576102229 | 5.76353342325693  | 3.91798946098165  |
| H               | -1.33628279833283 | 7.83034169275257  | 0.38195396010363  |
| C               | -0.99517916022081 | 5.69852775564304  | -3.69432496339809 |
| H               | -0.37718080824520 | 3.99393116936498  | -4.86609413670982 |
| H               | -1.47617169165344 | 7.28246226957188  | -2.30074723266006 |
| H               | -1.35127390041687 | 6.25205530107163  | -4.56514960301960 |
| N               | 0.32331028290359  | 3.75087070617023  | -0.26861057218188 |
| C               | -1.08391185081917 | 8.10184636173774  | 3.07784059793088  |
| C               | -0.11737336225316 | 9.06116009962624  | 3.44308812566969  |
| C               | -2.42136710825511 | 8.24268017206482  | 3.50163518488277  |
| C               | 1.25406287830122  | 8.96885407328741  | 3.03204176820414  |
| C               | -0.50234732424142 | 10.18577693782457 | 4.25119679866764  |
| C               | -2.79624573353495 | 9.37245744436738  | 4.30734519307675  |
| C               | -3.44085151090086 | 7.29048573302583  | 3.16635007713566  |
| C               | 2.16770527826145  | 9.91359925579672  | 3.39942838536386  |
| H               | 1.56335643721414  | 8.12558228484074  | 2.41379761506477  |
| C               | 0.48816833956293  | 11.15400499717211 | 4.61518249996010  |
| C               | -1.82970215122280 | 10.31418922825694 | 4.66216782809723  |
| C               | -4.15771457957210 | 9.50486450598657  | 4.73176241302808  |
| H               | -3.17359107576542 | 6.42302037938582  | 2.56227647343774  |
| C               | -4.72749446532021 | 7.45239604577135  | 3.59159975327264  |
| C               | 1.78196583011136  | 11.02492836595973 | 4.20533215505150  |
| H               | 3.20622651572105  | 9.82206769576874  | 3.07384381102086  |
| H               | 0.17961742996066  | 12.00209327793284 | 5.23107586514178  |
| H               | -2.11875539899838 | 11.17125430206178 | 5.27570159994842  |
| C               | -5.09547101290697 | 8.57776670498231  | 4.38617335974050  |
| H               | -4.42669495947624 | 10.36999321897538 | 5.34251490067601  |
| H               | -5.48607941924951 | 6.71347892866237  | 3.32442325920311  |
| H               | 2.52824469618782  | 11.76990508956355 | 4.48932357842695  |
| H               | -6.13037895084268 | 8.68948977783572  | 4.71648333207649  |
| The $Q_1$ state |                   |                   |                   |
| C               | 2.73036780247528  | -1.37227890440801 | 0.64373909118641  |
| C               | 2.10521610812870  | -0.05462007850531 | 0.44059844409186  |
| C               | 0.83373796918056  | 0.09155461106721  | -0.15428118266721 |
| C               | 2.73784770020504  | 1.15054726184302  | 0.81330780500954  |
| C               | 0.24270629323706  | 1.32725903071254  | -0.37050233553959 |

|    |                   |                   |                   |
|----|-------------------|-------------------|-------------------|
| C  | 2.16837159866611  | 2.39746347919949  | 0.59598091373158  |
| C  | 0.91356474905459  | 2.49229491432939  | -0.00279908363974 |
| H  | -0.75484458637042 | 1.37809390689967  | -0.80507935505336 |
| H  | 2.72173308232260  | 3.29598496302791  | 0.86643013081096  |
| C  | 3.28545826103362  | -1.73435983098009 | 1.95894430016708  |
| C  | 2.55320576578435  | -1.57883100535798 | 3.15571312602207  |
| C  | 4.58489561879410  | -2.26505605480322 | 2.10873707665655  |
| C  | 3.06337744443176  | -1.92118172100813 | 4.40118251926019  |
| C  | 5.11623662934621  | -2.62157244618923 | 3.34116472221525  |
| C  | 4.34707357163250  | -2.44534255158112 | 4.48412534081115  |
| H  | 2.45286632479828  | -1.79588993563728 | 5.29426372785257  |
| H  | 6.12929638780468  | -3.01590714603428 | 3.40569012170642  |
| C  | 2.79312674099024  | -2.32898350161319 | -0.47562507178326 |
| C  | 3.27205352055046  | -1.96444050214649 | -1.75261869632604 |
| C  | 2.36723256395614  | -3.66884399050793 | -0.34965592012933 |
| C  | 3.31843608437281  | -2.84935166571660 | -2.82175630273930 |
| C  | 2.40842613609231  | -4.57536380301087 | -1.40091294378234 |
| C  | 2.88299259274115  | -4.15513025719780 | -2.63682761659527 |
| H  | 3.70769294478850  | -2.52223939166822 | -3.78479060181218 |
| H  | 2.05270385576244  | -5.59447660134836 | -1.25659100801569 |
| Cl | 0.90840893363978  | -1.01978064296211 | 3.12219591988618  |
| Cl | 5.63909904685627  | -2.42450099425153 | 0.73700957020290  |
| Cl | 4.99652734988622  | -2.88362817588094 | 6.02961166280718  |
| Cl | 1.67176632858648  | -4.24194564420662 | 1.13582719541889  |
| Cl | 3.91822008124245  | -0.37669072253685 | -2.03785024969740 |
| Cl | 2.93145363673929  | -5.27018962956622 | -3.96227974650794 |
| Cl | -0.11954474146789 | -1.30448703986240 | -0.55858081177266 |
| Cl | 4.34461022277663  | 1.13648366257780  | 1.47624475864362  |
| C  | 0.06910792076796  | 4.73006349963746  | 0.72055803314655  |
| C  | -0.13068523422790 | 4.21578729289868  | -1.47476375957051 |
| C  | 0.31291822114035  | 4.71907735212562  | 2.09511359899202  |
| C  | -0.56143357567310 | 5.82999175696932  | 0.10100996889853  |
| C  | -0.06270753229643 | 3.60923334322201  | -2.73081923715683 |
| C  | -0.68313663671073 | 5.50399118886129  | -1.30743894868469 |
| C  | -0.07091520719010 | 5.83153901725534  | 2.83190953943165  |
| H  | 0.78286090303073  | 3.86544401577277  | 2.58466111373078  |
| C  | -0.94553853464135 | 6.93297438780580  | 0.86467500470275  |
| C  | -0.57456504698824 | 4.31081561648391  | -3.81584122334514 |
| H  | 0.38180119476803  | 2.62219868663283  | -2.86276051332773 |
| C  | -1.19114876118219 | 6.19018068131411  | -2.41370143349267 |
| C  | -0.70198708062258 | 6.94646896493168  | 2.23938574421360  |
| H  | 0.11009233869149  | 5.84107773363019  | 3.90887210403357  |
| H  | -1.43820565281123 | 7.78469828248269  | 0.39053326571769  |
| C  | -1.13750672861787 | 5.58727316253553  | -3.66356366499429 |



|   |                   |                   |                   |
|---|-------------------|-------------------|-------------------|
| H | -0.53255311277831 | 3.85745066457117  | -4.80860075180166 |
| H | -1.61911911848216 | 7.18802142767599  | -2.29548593326353 |
| H | -1.53076545382406 | 6.11036570304141  | -4.53739779765312 |
| N | 0.32499478692609  | 3.75189358695333  | -0.23925334505942 |
| C | -1.11105365278565 | 8.10813112602765  | 3.06847610369518  |
| C | -0.09621420303008 | 8.97412312211544  | 3.64548368986893  |
| C | -2.52370922174466 | 8.36985115735913  | 3.29180015063891  |
| C | 1.26712197247597  | 8.77822502258424  | 3.43187336807897  |
| C | -0.50201900079813 | 10.09629988231460 | 4.44471589891724  |
| C | -2.91048501245329 | 9.50328478747870  | 4.08482543576647  |
| C | -3.52948064184870 | 7.54606913784507  | 2.78869505852608  |
| C | 2.23450351649117  | 9.63660236938085  | 3.99624372138628  |
| H | 1.59825787369262  | 7.94635696418862  | 2.81012139054245  |
| C | 0.46916513649689  | 10.93258418720983 | 4.99433098588711  |
| C | -1.89661846384995 | 10.34170454356038 | 4.64633457230612  |
| C | -4.26421519770588 | 9.75510868971657  | 4.30537878613047  |
| H | -3.26014841760316 | 6.66616654206158  | 2.20447373042978  |
| C | -4.89402041639115 | 7.81783841484325  | 3.02356189495688  |
| C | 1.84080693457409  | 10.70408369589235 | 4.77499884315523  |
| H | 3.29326283824638  | 9.44812090703705  | 3.80689809008840  |
| H | 0.14953632988171  | 11.78293966281016 | 5.60150389587036  |
| H | -2.19838356311682 | 11.19905385065837 | 5.25208331951159  |
| C | -5.26095513004462 | 8.91524592084467  | 3.77319816098008  |
| H | -4.54735595931016 | 10.62043356362840 | 4.90959589593905  |
| H | -5.65186962795919 | 7.14971980354741  | 2.60923362017288  |
| H | 2.58080448547680  | 11.37488958845452 | 5.21635321962219  |
| H | -6.31399928601099 | 9.13417010296353  | 3.96166390259264  |
